# Supplementary material
Source: Springer Nature journal article supplement (https://www.springermedizin.de/resource/supplementary/12985_2010_1100_MOESM9_ESM.pdf/9609140)

**A**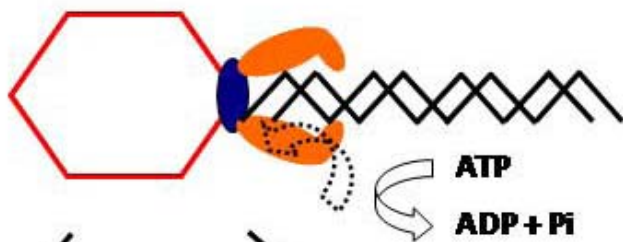**Duplex DNA****Nicked DNA****B**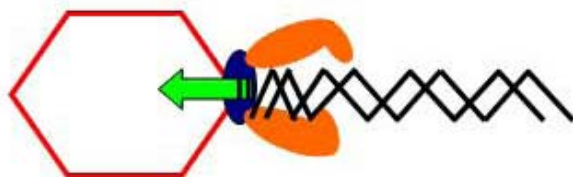**C**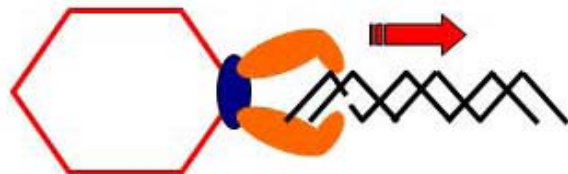**D**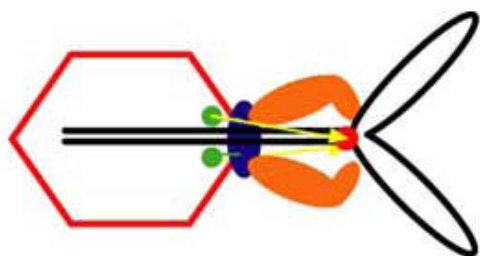**E**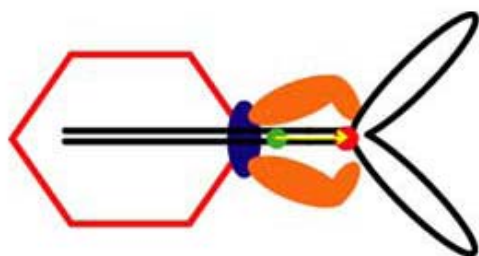

Supplement: MOESM9 [file 9609140]
